# Supplementary material for: Splenectomy Normalizes Hematocrit in Murine Polycythemia Vera
Source: PubMed Central journal article supplement (PMC2749451; doi:10.1371/journal.pone.0007286), 2009-09-30
Supplement: pone.0007286.s001.pdf [file pone.0007286.s001.pdf]

# STab1

Surgery → V617F Transplant

|                                               | C57BL/6     |              |            |              | BALB/c |  |     |  |
|-----------------------------------------------|-------------|--------------|------------|--------------|--------|--|-----|--|
|                                               | SH          |              | SPL        |              | SH     |  | SPL |  |
| <b>Bone Marrow</b>                            |             |              |            |              |        |  |     |  |
| GFP <sup>+</sup> cells (x10 <sup>6</sup> )    | 3.0 ± 1.3   | 3.0 ± 1.3    | 2.2 ± 0.9  | 1.0 ± 0.1**  |        |  |     |  |
| GFP <sup>+</sup> cells (%)                    | 14.6 ± 6.2  | 16.2 ± 5.2   | 22.9 ± 9.0 | 26.7 ± 3.5   |        |  |     |  |
| Ter119 <sup>+</sup> cells (x10 <sup>6</sup> ) | 12.5 ± 1.1  | 10.5 ± 1.2** | 5.7 ± 1.0  | 1.7 ± 0.2**  |        |  |     |  |
| Ter119 <sup>+</sup> cells (%)                 | 60.7 ± 5.2  | 57.9 ± 6.5   | 58.9 ± 1.0 | 44.4 ± 4.7** |        |  |     |  |
| Cellularity (x10 <sup>6</sup> )               | 20.1 ± 4.6  | 20.3 ± 4.8   | 11.5 ± 2.7 | 6.5 ± 1.8**  |        |  |     |  |
| <b>Peripheral Blood</b>                       |             |              |            |              |        |  |     |  |
| WBC (x10 <sup>3</sup> /ul)                    | 63.0 ± 35   | 23 ± 6**     | 153 ± 36   | 36 ± 7**     |        |  |     |  |
| PLT (x10 <sup>3</sup> /ul)                    | 2112 ± 751  | 919 ± 195**  | 1040 ± 282 | 948 ± 170    |        |  |     |  |
| RBC (x10 <sup>6</sup> /ul)                    | 13.9 ± 1.2  | 10.2 ± 1.9** | 11.5 ± 0.9 | 7.2 ± 0.3**  |        |  |     |  |
| RBC mass (x10 <sup>9</sup> )                  | 29.1 ± 11.5 | 27.8 ± 8.2   | 15.6 ± 3.6 | 12.9 ± 1.8   |        |  |     |  |
| <b>Spleen</b>                                 |             |              |            |              |        |  |     |  |
| Size (mg)                                     | 477 ± 119   | NA           | 640 ± 82   | NA           |        |  |     |  |
| Total cells (x10 <sup>6</sup> )               | 772 ± 228   |              | 393 ± 100  |              |        |  |     |  |
| GFP <sup>+</sup> cells (x10 <sup>6</sup> )    | 112 ± 73    |              | 32 ± 8     |              |        |  |     |  |
| GFP <sup>+</sup> cells (%)                    | 14.5 ± 9.4  |              | 10.1 ± 2.6 |              |        |  |     |  |
| Ter119 <sup>+</sup> cells (x10 <sup>6</sup> ) | 642 ± 29    |              | 236 ± 8    |              |        |  |     |  |
| Ter119 <sup>+</sup> cells (%)                 | 83.0 ± 3.7  |              | 74.0 ± 2.4 |              |        |  |     |  |
| <b>Liver</b>                                  |             |              |            |              |        |  |     |  |
| Size (mg)                                     | 1229 ± 58   | 1131 ± 129   | 1247 ± 82  | 1217 ± 56    |        |  |     |  |

\*\* ,  $P < 0.01$
