# Supplementary material for: Splenectomy Normalizes Hematocrit in Murine Polycythemia Vera
Source: PubMed Central journal article supplement (PMC2749451; doi:10.1371/journal.pone.0007286), 2009-09-30
Supplement: pone.0007286.s002.pdf [file pone.0007286.s002.pdf]

# STab2

## V617F BMT → Surgery

|                                            | C57BL/6    |              | BALB/c      |             |
|--------------------------------------------|------------|--------------|-------------|-------------|
|                                            | SH         | SPL          | SH          | SPL         |
| <b>Bone Marrow</b>                         |            |              |             |             |
| Total cells (x10 <sup>6</sup> )            | 27.7 ± 5.6 | 15.5 ± 4.7** | 8.7 ± 1.2   | 8.2 ± 1.1   |
| Frequency live (%)                         | 86.6 ± 2.2 | 79.5 ± 3.0** | 78.4 ± 4.0  | 71.8 ± 6.3* |
| GFP <sup>+</sup> cells (x10 <sup>6</sup> ) | 9.7 ± 2.4  | 8.7 ± 2.1    | 4.1 ± 0.5   | 3.5 ± 0.7   |
| GFP <sup>+</sup> cells (%)                 | 34.0 ± 8.4 | 40.0 ± 9.9   | 47.9 ± 6.2  | 41.5 ± 8.1  |
| <b>Peripheral Blood</b>                    |            |              |             |             |
| WBC (x10 <sup>3</sup> /ul)                 | 41.2 ± 6.6 | 47.1 ± 38.2  | 63.2 ± 25.9 | 25.9 ± 8.7* |
| PLT (x10 <sup>3</sup> /ul)                 | 356 ± 111  | 528 ± 360    | 490 ± 124   | 619 ± 238   |
| RBC (x10 <sup>6</sup> /ul)                 | 14.2 ± 1.7 | 7.0 ± 0.8**  | 9.6 ± 1.3   | 6.4 ± 0.7** |
| RBC mass (x10 <sup>9</sup> )               | 17.3 ± 2.3 | 16.4 ± 5.8   |             | NA          |

\*,  $P < 0.05$ ; \*\*,  $P < 0.01$
